# Supplementary material for: Protected-annealing regulated defects to improve optical properties and luminescence performance of Ce:YAG transparent ceramics for white LEDs
Source: Royal Society of Chemistry journal article supplement (doi:10.1039/c8tc06600k), 2019-01-01
Supplement: c8tc06600k1.pdf [file c8tc06600k1.pdf]

## Electronic Supplementary Information

### Protected-annealing regulated defects to improve optical properties and luminescence performance of Ce:YAG transparent ceramic for white LED

Bingheng Sun,<sup>‡ a</sup> Le Zhang,<sup>‡ a, b, e, \*</sup> Tianyuan Zhou<sup>a, b</sup>, Cen Shao<sup>a</sup>, Lei Zhang<sup>c</sup>, Yuelong Ma<sup>a, d</sup>, Qing Yao<sup>a, d</sup>, Zhigang Jiang<sup>a, d</sup>, Farida A Selim<sup>b</sup>, Hao Chen<sup>a, \*</sup>

<sup>a</sup> Jiangsu Key Laboratory of Advanced Laser Materials and Devices, School of Physics and Electronic Engineering, Jiangsu Normal University, Xuzhou, 221116, P.R. China

<sup>b</sup> Department of Physics and Astronomy, Bowling Green State University, Bowling Green, 43403, USA

<sup>c</sup> SUSTech Academy for Advanced Interdisciplinary Studies, Southern University of Science and Technology, Shenzhen 518055, P. R. China

<sup>d</sup> School of Mechanical Engineering, Jiangsu University, Zhenjiang, 212013, P.R. China

<sup>e</sup> School of Materials Science and Engineering, Georgia Institute of Technology, Atlanta, 30332, USA

\* To whom correspondence should be addressed.

Tel: +86-0516-83403242; E-mail: [zhangle@jsnu.edu.cn](mailto:zhangle@jsnu.edu.cn) (Le Zhang), [chenhao@jsnu.edu.cn](mailto:chenhao@jsnu.edu.cn) (Hao Chen), [faselim@bgsu.edu](mailto:faselim@bgsu.edu) (Farida A Selim)

<sup>‡</sup> These authors contributed equally to this work.

#### 1 Detailed Fabrication of Transparent Ceramics

In this work, high purity powders Y<sub>2</sub>O<sub>3</sub> (99.99% purity, Alfa Aesar, Ward Hill, America), α-Al<sub>2</sub>O<sub>3</sub> (99.99% purity, Alfa Aesar, Ward Hill) and CeO<sub>2</sub> (99.99% purity, Alfa Aesar, Ward Hill) were selected as the starting material. The mean particle sizes of the starting Y<sub>2</sub>O<sub>3</sub>, Al<sub>2</sub>O<sub>3</sub> and CeO<sub>2</sub> powders were 5.0 μm, 300 nm and 5 μm, respectively. They were weighted precisely in stoichiometric

proportions to obtain  $(\text{Ce}_x\text{Y}_{1-x})_3\text{Al}_5\text{O}_{12}$ , ( $x=0.0005$  and  $0.002$ ). Tetraethyl orthosilicate (TEOS, 99.99%, Alfa Aesar) and MgO (99.999%, Alfa Aesar, Ward Hill, MA) were selected as sintering additives.

These powders were mixed with 0.3 wt.% DS005 (99.9 % purity, Alfa Aesar, Ward Hill, America) as a dispersing agent in anhydrous ethyl alcohol in a ball milling jar, and then planetary ball milled for 15 h to obtain powders with a uniform particle size distribution and mean particle size of  $0.39 \mu\text{m}$ . The mixture was dried at  $60 \text{ }^\circ\text{C}$  in an oven for 24 h, and then meshed and sieved through a 100-mesh screen. After that, the sieved powder mixture was initially uniaxially pressed at 20 MPa in a stainless-steel mold with a diameter of 22 mm, and then cold isostatic pressed at 200 MPa for 300 s, to obtain compacted powder pellets with a relative density of ~53 % of the theoretical value of YAG. The pressed pellets were then calcined at  $800 \text{ }^\circ\text{C}$  for 4 h in air in a muffle furnace to remove the volatile organic residues. The calcined green bodies were then sintered in a tungsten mesh heated vacuum furnace at  $1780 \text{ }^\circ\text{C}$  for 8 h, Subsequently, air annealing treatment was carried out in a muffle furnace after vacuum sintering. Hydrogen annealing (5%  $\text{H}_2$ /95%  $\text{N}_2$ ) was also performed using a tube furnace under the gas flow rate was 20 ml/min. After that, the specimens were mirror polished on both surfaces to 1.0 mm-thick.

## **2 XPS spectra**

Chemical states of Ce atoms of 0.2 at.% Ce:YAG transparent ceramics

following different annealing conditions were measured by X-ray photoelectron spectroscopy (XPS), as shown in Fig. S1. It is well known that the special peaks at 885 eV and 917 eV are corresponding to the characteristic peaks of Ce(III) and Ce(IV), respectively. Unfortunately, no obvious special peaks were observed from the figure. For Ce:YAG ceramics, Ce<sup>3+</sup> ions are embedded in YAG lattice and only few Ce ions are floated on the surface of tested specimens. Accordingly, no obvious XPS peaks were observed from XPS spectrum.

### 3 Supplementary Figures

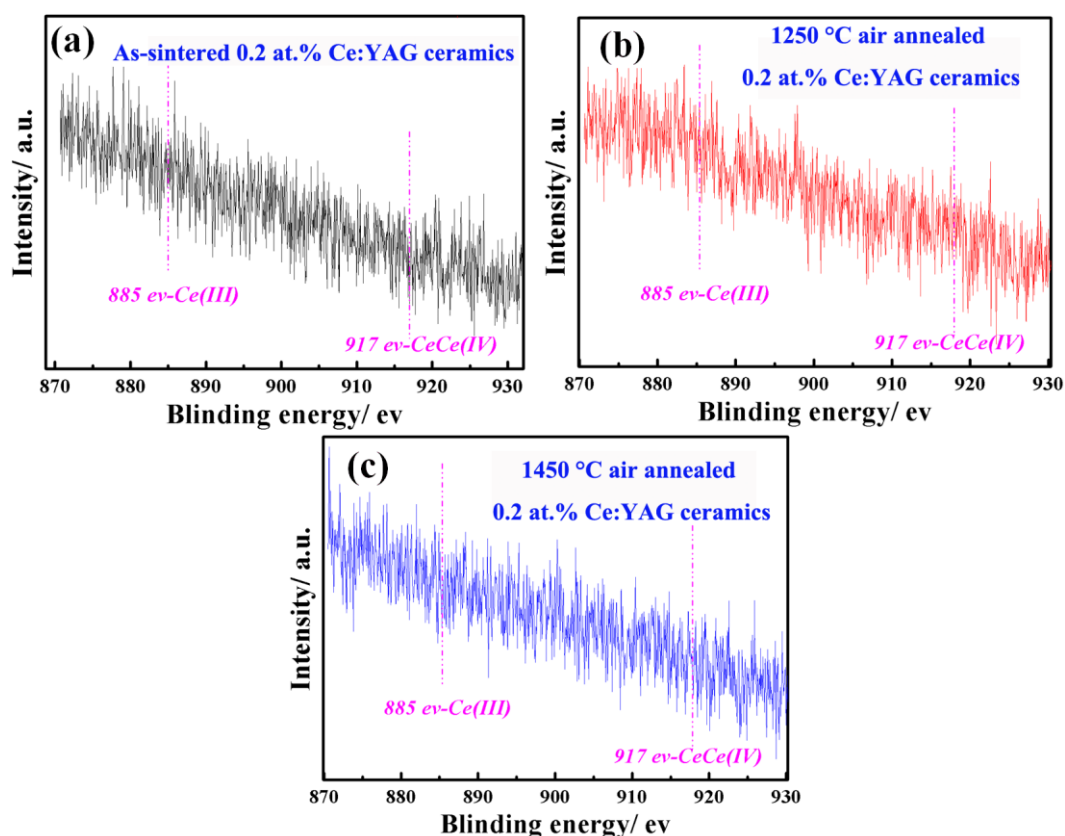

**Fig. S1 The Ce 3d photoemission spectra in XPS for (a) as-sintered, (b) 1250 °C air annealed, and (c) 1450 °C air annealed 0.2 at.% Ce:YAG ceramics**
